# Supplementary material
Source: Springer Nature journal article supplement (https://www.springermedizin.de/resource/supplementary/13054_2010_8801_MOESM4_ESM.pdf/9732604)

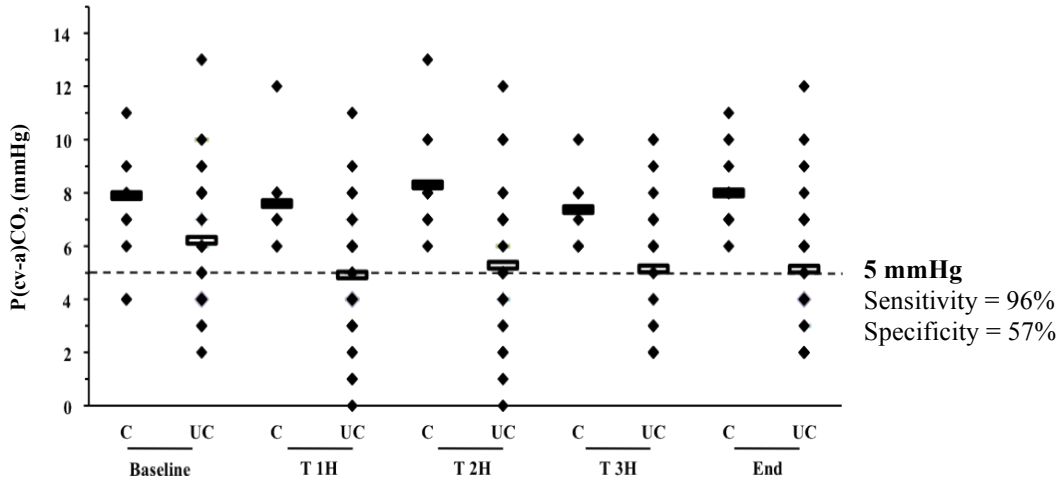

Supplement: MOESM4 [file 9732604]
